# Supplementary material for: Synthesis and photovoltaic properties of dithieno[3,2-b:2′,3′-d]silole-based conjugated copolymers
Source: Royal Society of Chemistry journal article supplement (doi:10.1039/c5ta01523e), 2015-01-01
Supplement: c5ta01523e1.pdf [file c5ta01523e1.pdf]

## **Synthesis and Photovoltaic Properties of Dithieno[3,2-b:2',3'-d]silole-Based conjugated copolymer**

**Shanpeng Wen<sup>a\*</sup>, Chen Wang<sup>a</sup>, Pengfei Ma<sup>b</sup>, Ying-Xuan Zhao<sup>a</sup>, Chang Li<sup>b</sup>, Shengping Ruan<sup>b\*</sup>**

*<sup>a</sup>State Key Laboratory on Integrated Optoelectronics, Jilin University, Changchun 130012, P. R. China. E-mail: sp\_wen@jlu.edu.cn*

*<sup>b</sup>College of Electronic Science and Engineering, Jilin University, Changchun 130012, P. R. China.*

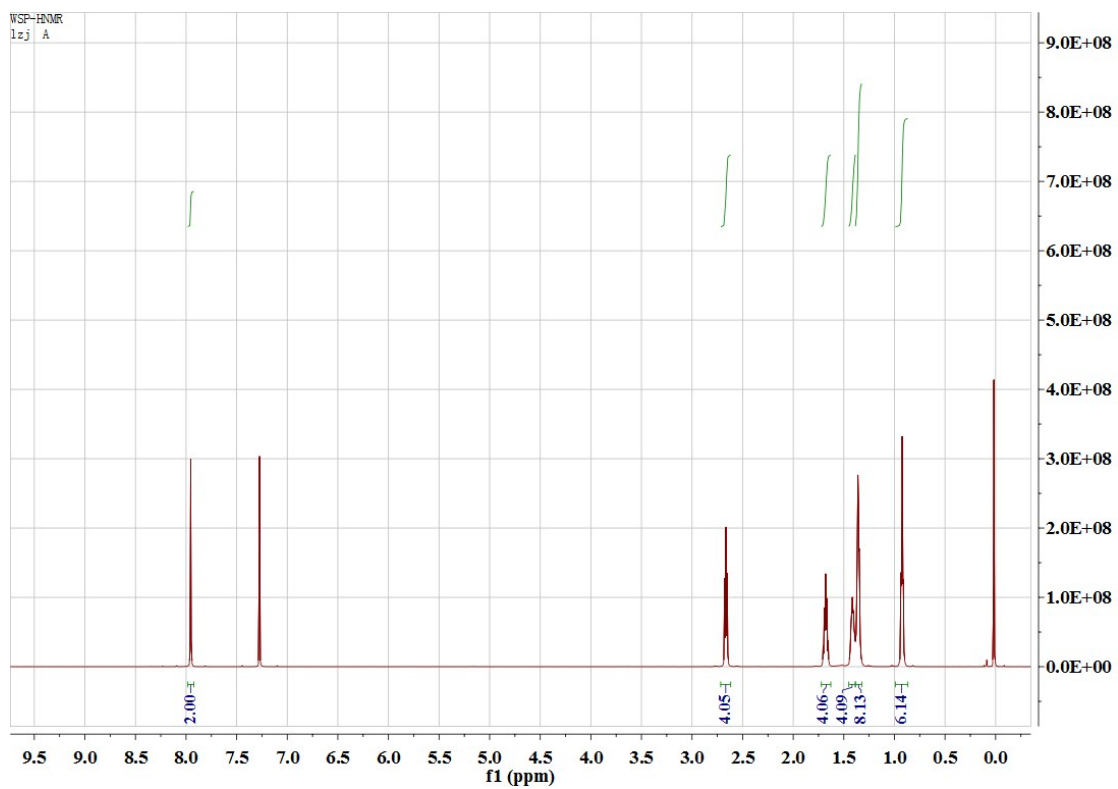

Figure S1.  $^1\text{H}$  NMR spectrum of M1 at room temperature.

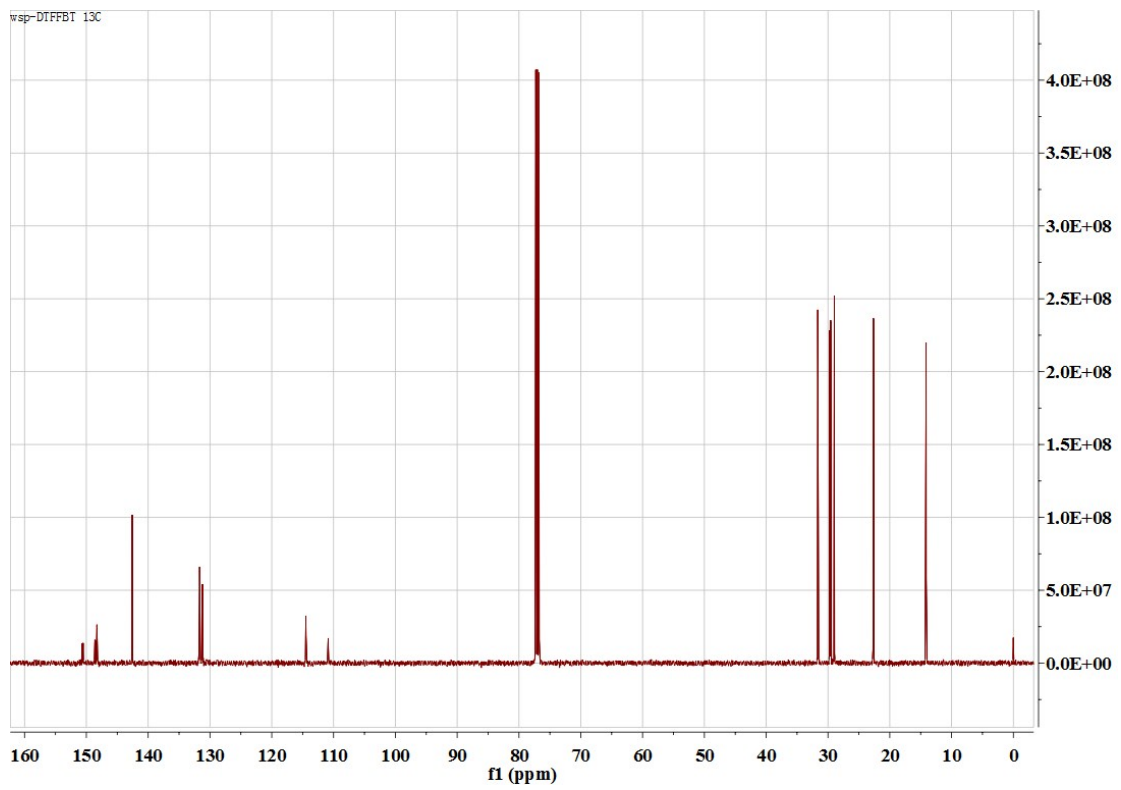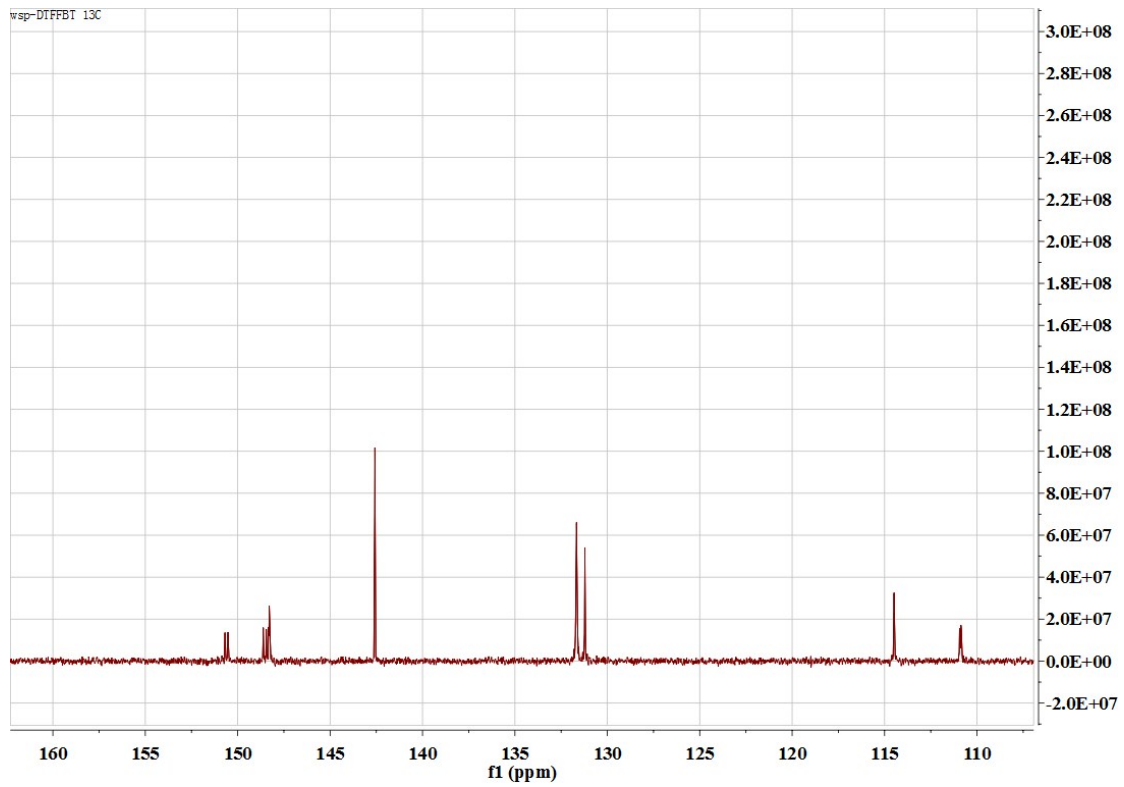

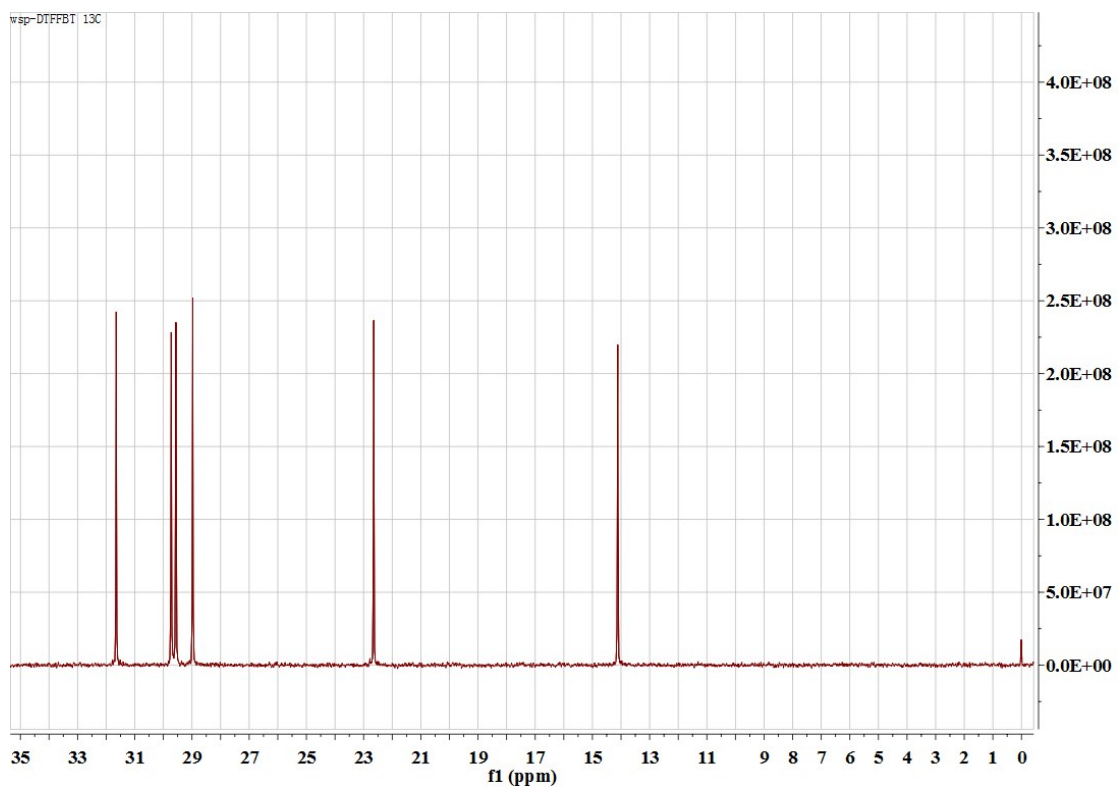

Figure S2.  $^{13}\text{C}$  NMR spectra of M1 at room temperature (the peaks above 110 ppm and below 35 ppm are also shown for clarity.).

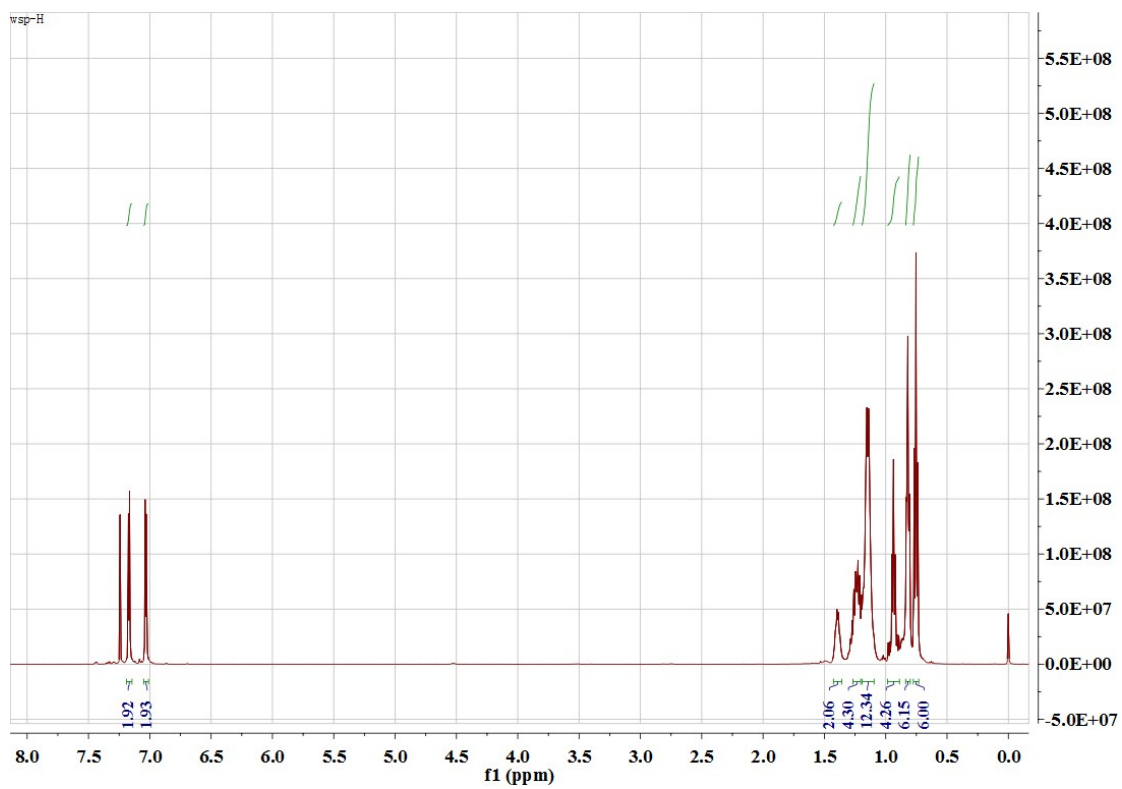

Figure S3.  $^1\text{H}$  NMR spectrum of compound **4** at room temperature.

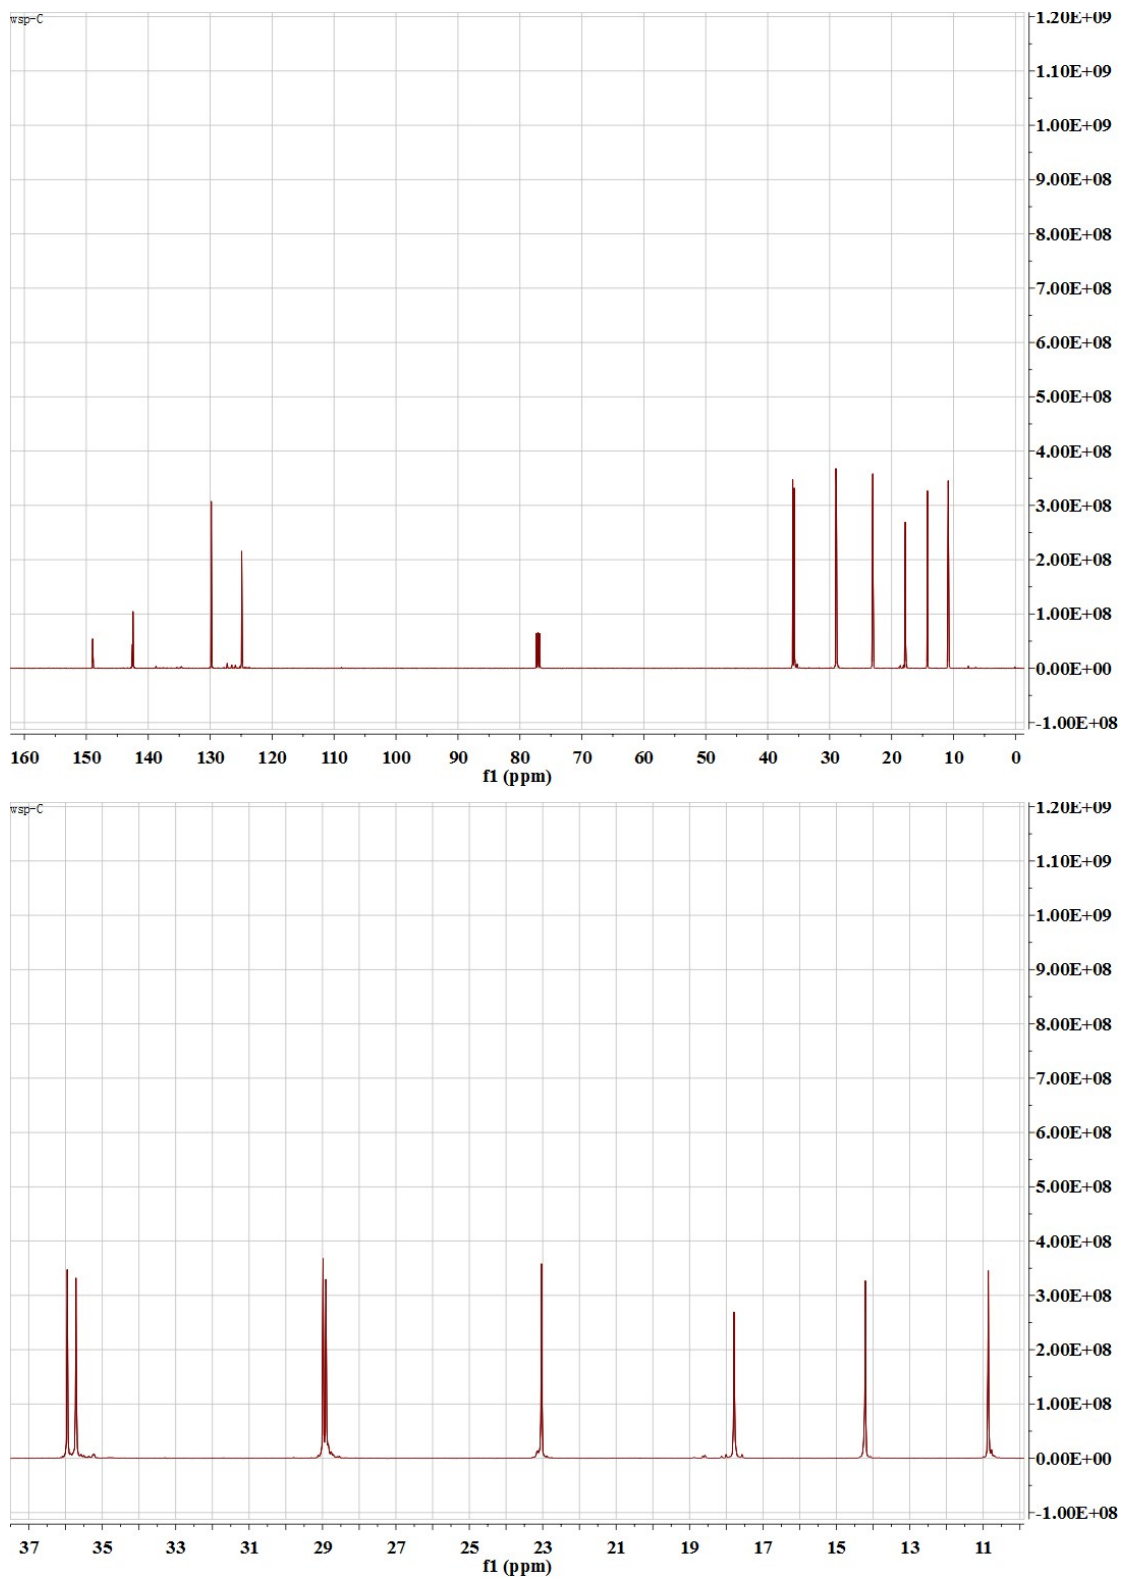

Figure S4.  $^{13}\text{C}$  NMR of spectra of compound **4** at room temperature (the peaks below 37 ppm are also shown for clarity).

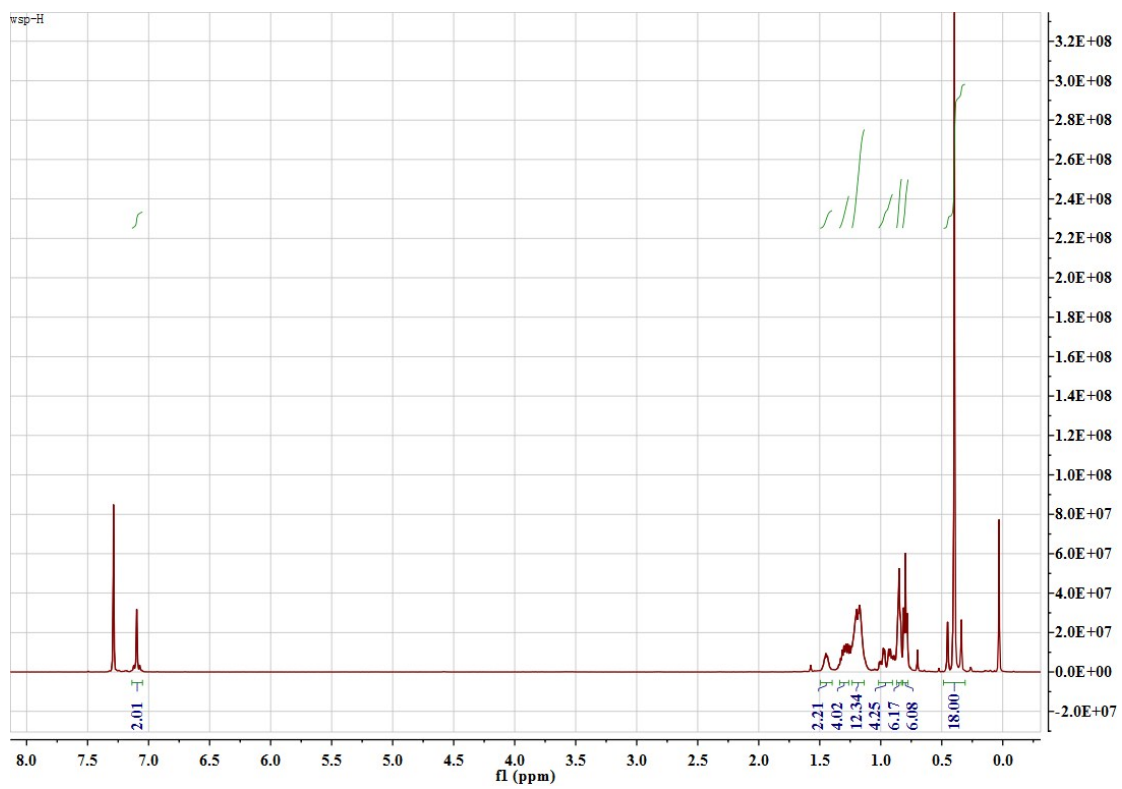

Figure S5. <sup>1</sup>H NMR spectrum of M2 at room temperature.

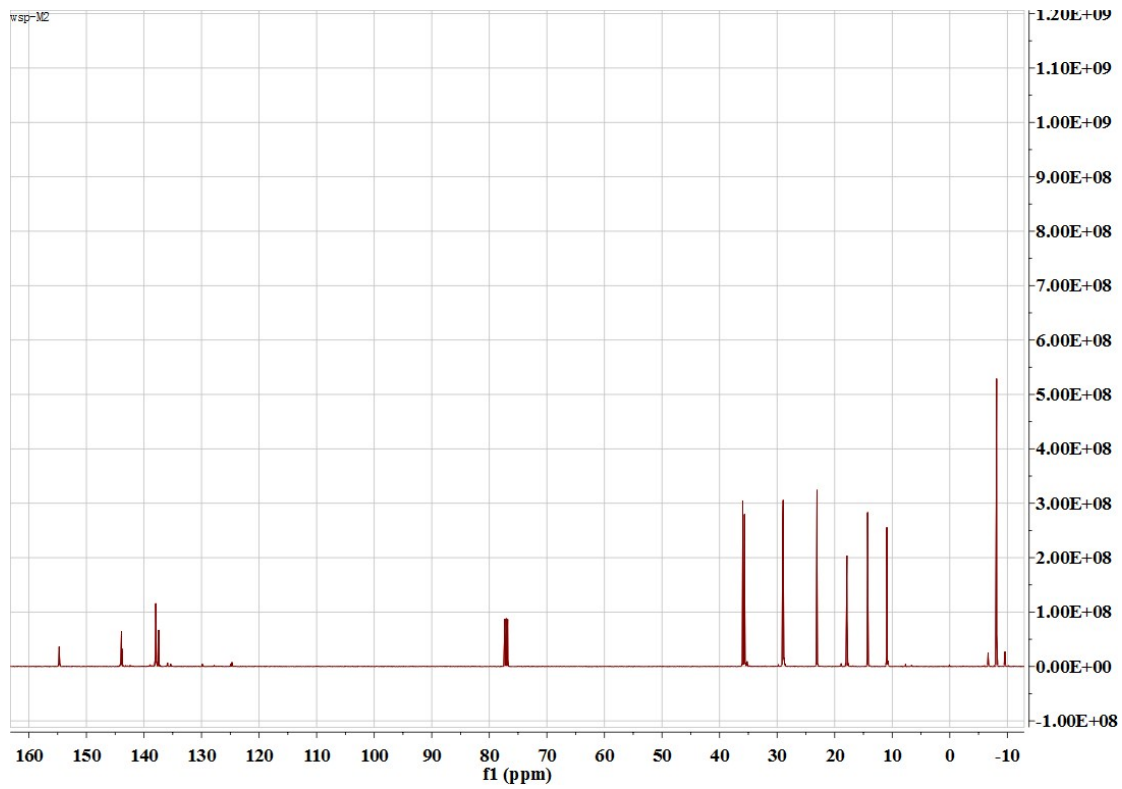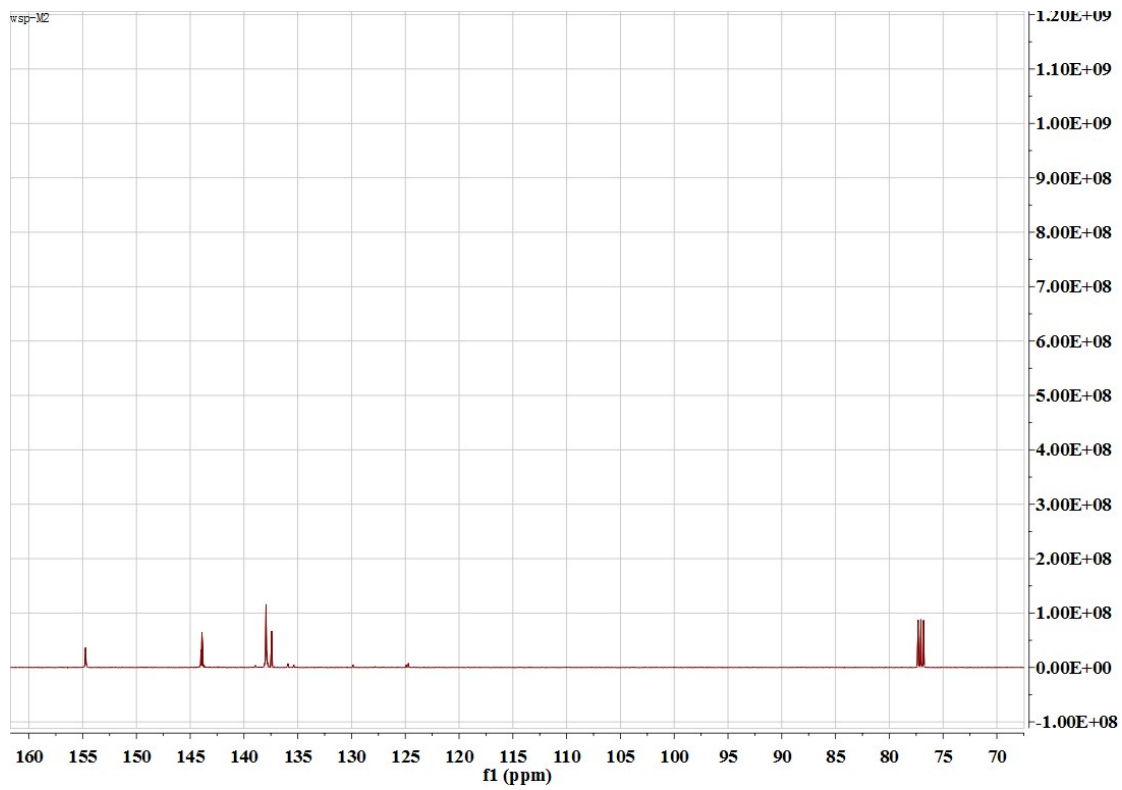



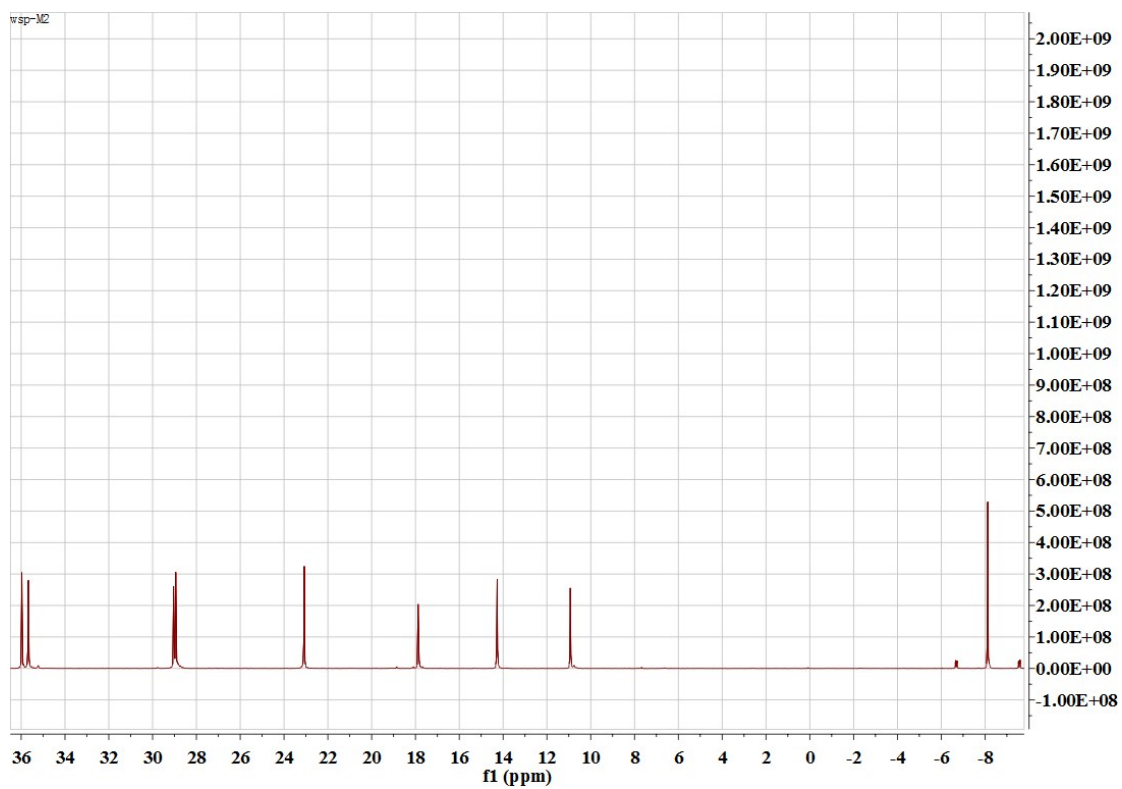

Figure S6.  $^{13}\text{C}$  NMR spectra of M2 at room temperature (The peaks above 70 ppm and below 36 ppm are shown for clarity.).
